# Supplementary material for: Utilization and Complications of Catheter Ablation for Atrial Fibrillation in Patients With Hypertrophic Cardiomyopathy
Source: PubMed Central journal article supplement — J Am Heart Assoc. 2020 Jun 23;9(13):e015721. doi: 10.1161/JAHA.119.015721 (PMC7670519; doi:10.1161/jaha.119.015721), 2020-06-23
Supplement: JAH3-9-e015721-s001.pdf [file JAH3-9-e015721-s001.pdf]

# **Supplemental Material**

## **Data S1.**

### **Supplemental Methods**

The “unweighted group” is a 20% stratified sample of inpatient discharges from US hospitals, statistically representing the total “weighted” discharged population. The NIS sampling frame includes data from 47 statewide data organizations, covering more than 97% of the US population. The annual sample encompasses approximately 8 million discharges, which represent 20% of inpatient hospitalizations across different hospital types and geographic regions. The national estimates of the entire US hospitalized population are calculated using a standardized sampling and weighting method provided by the HCUP. The NIS dataset has been validated and used extensively over the years to accurately assess national trends in the utilization, disparities, and outcomes in various fields of medicine.

**Table S1. ICD-9 Codes used to calculate the Deyo Comorbidity index.**

| ICD-9 CM codes                                     | Condition                                         | Score |
|----------------------------------------------------|---------------------------------------------------|-------|
| 410 – 410.9                                        | Myocardial infarction                             | 1     |
| 428 – 428.9                                        | Congestive heart failure                          | 1     |
| 433.9, 441 – 441.9, 785.4, V43.4                   | Peripheral vascular disease                       | 1     |
| 430 – 438                                          | Cerebrovascular disease                           | 1     |
| 290 – 290.9                                        | Dementia                                          | 1     |
| 490 – 496, 500 – 505, 506.4                        | Chronic pulmonary disease                         | 1     |
| 710.0, 710.1, 710.4, 714.0 – 714.2, 714.81, 725    | Rheumatologic disease                             | 1     |
| 531 – 534.9                                        | Peptic ulcer disease                              | 1     |
| 571.2, 571.5, 571.6, 571.4 – 571.49                | Mild liver disease                                | 1     |
| 250 – 250.3, 250.7                                 | Diabetes                                          | 1     |
| 250.4 – 250.6                                      | Diabetes with chronic complications               | 2     |
| 344.1, 342 – 342.9                                 | Hemiplegia or paraplegia                          | 2     |
| 582 – 582.9, 583 – 583.7, 585, 586, 588 –<br>588.9 | Renal disease                                     | 2     |
| 140-172.9, 174-195.8, 200-208.9                    | Any malignancy including leukemia<br>and lymphoma | 2     |
| 572.2 – 572.8                                      | Moderate or severe liver disease                  | 3     |
| 196-199.1                                          | Metastatic solid tumor                            | 6     |
| 042 – 044.9                                        | Acquired Immunodeficiency<br>syndrome (AIDS)      | 6     |

**Table S2. ICD-9 codes for procedural complications used in the study.**

| <b>Complication</b>                                                                                                 | <b>ICD-9-CM Code(s)</b>                                              |
|---------------------------------------------------------------------------------------------------------------------|----------------------------------------------------------------------|
| <b>Hemorrhage/Hematoma</b>                                                                                          |                                                                      |
| Hemorrhage/hematoma complicating a procedure                                                                        | 998.11-998.12                                                        |
| Acute post-hemorrhagic anemia                                                                                       | 285.1                                                                |
| Hemorrhage requiring transfusion                                                                                    | (998.11-998.12, 285.1) AND (99.01-99.09)                             |
| <b>Cardiac</b>                                                                                                      |                                                                      |
|                                                                                                                     | 997.1                                                                |
| (including postoperative cardiac block, myocardial infarction, cardiac arrest, congestive heart failure and others) |                                                                      |
| <b>Pericardial</b>                                                                                                  |                                                                      |
| Hemopericardium                                                                                                     | 423.0                                                                |
| Tamponade                                                                                                           | 423.3                                                                |
| Pericardiocentesis                                                                                                  | 37.0                                                                 |
| Acute pericarditis                                                                                                  | 420.90                                                               |
| <b>Pulmonary</b>                                                                                                    |                                                                      |
| Pneumothorax/hemothorax                                                                                             | 512.1-512.2, 511.8                                                   |
| Diaphragm paralysis                                                                                                 | 519.4                                                                |
| Post-operative Respiratory Failure                                                                                  | 518.51, 518.53                                                       |
| Other iatrogenic Respiratory Complications                                                                          | 997.3                                                                |
| <b>Vascular</b>                                                                                                     |                                                                      |
| Accidental puncture or laceration during a procedure                                                                | 998.2, e8700-e709                                                    |
| Injury to blood vessels                                                                                             | 900-904                                                              |
| Arteriovenous Fistula                                                                                               | 447                                                                  |
| Injury to retroperitoneum                                                                                           | 8680.4                                                               |
| Vascular complication requiring surgical repair                                                                     | 39.31, 39.41, 39.49, 39.52, 39.53, 39.56, 39.57, 39.58, 39.59, 39.79 |
| Other vascular complications                                                                                        | 997.2, 997.7                                                         |
| <b>Infection</b>                                                                                                    |                                                                      |
| Fever                                                                                                               | 780.60, 780.62                                                       |
| Septicemia                                                                                                          | 038.*, 995.91-995.92, 998.02, 790.7                                  |
| Post-procedural aspiration pneumonia                                                                                | 997.32                                                               |
| <b>Neurological</b>                                                                                                 |                                                                      |
| Nervous system complication, unspecified                                                                            | 997.00                                                               |
| Central nervous system complication                                                                                 | 997.01                                                               |
| Iatrogenic cerebrovascular infarction or hemorrhage                                                                 | 997.02                                                               |
| Transient ischemic attack                                                                                           | 435.9                                                                |
